# Supplementary material for: A metal–organic framework derived electrical insulating–conductive double-layer configuration for stable lithium metal anodes
Source: Royal Society of Chemistry journal article supplement (doi:10.1039/d1ta02951g), 2021-01-01
Supplement: d1ta02951g1.pdf [file d1ta02951g1.pdf]

## Supporting information

### **Metal-organic framework derived electrical insulating-conductive double-layer structure for stable lithium metal anode**

Jianzong Man<sup>a</sup>, Wenlong Liu<sup>a</sup>, Haibang Zhang<sup>a</sup>, Kun Liu<sup>a</sup>, Yongfu Cui<sup>b</sup>, Jinpeng Yin<sup>a</sup>, Xinyu Wang <sup>\*a</sup>, and Juncai Sun <sup>\*a</sup>

<sup>a</sup> Institute of Materials and Technology, Dalian Maritime University, Dalian, 116026, China

<sup>b</sup> School of Transportation Engineering, Guizhou Institute of Technology, Guiyang, 550003, China

\*Corresponding author: [sunjc@dlnu.edu.cn](mailto:sunjc@dlnu.edu.cn) (J. Sun),

[wangxinyu@dlnu.edu.cn](mailto:wangxinyu@dlnu.edu.cn) (X. W)

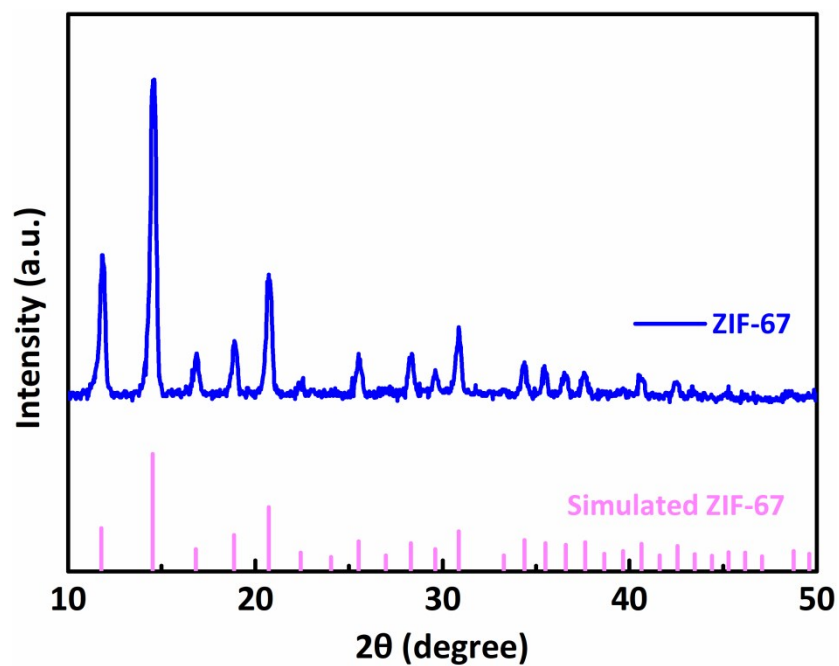

Fig. S1 XRD patterns of ZIF-67 and simulated ZIF-67.

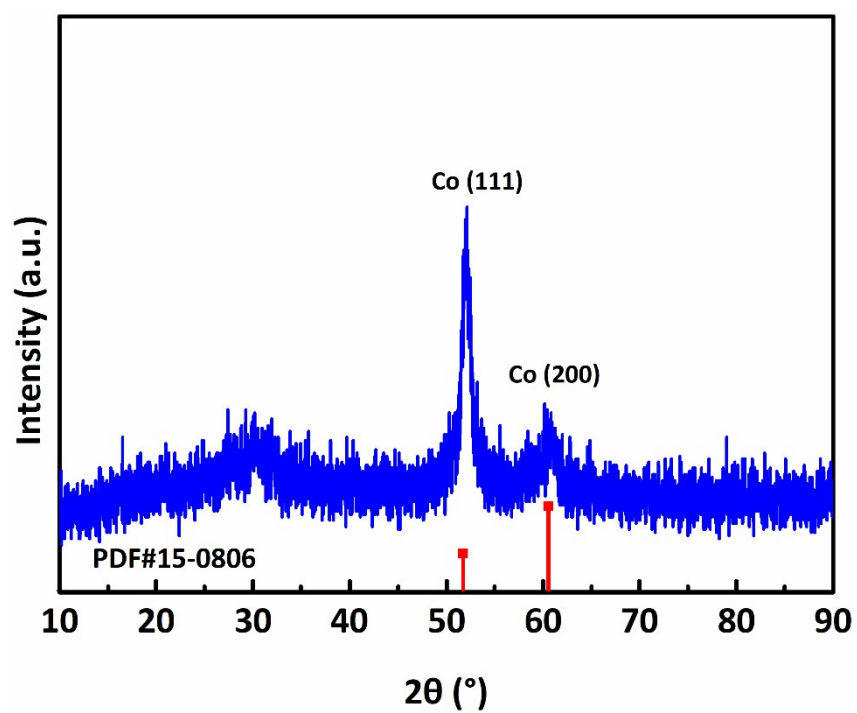

Fig. S2 XRD pattern of Co@NPC.

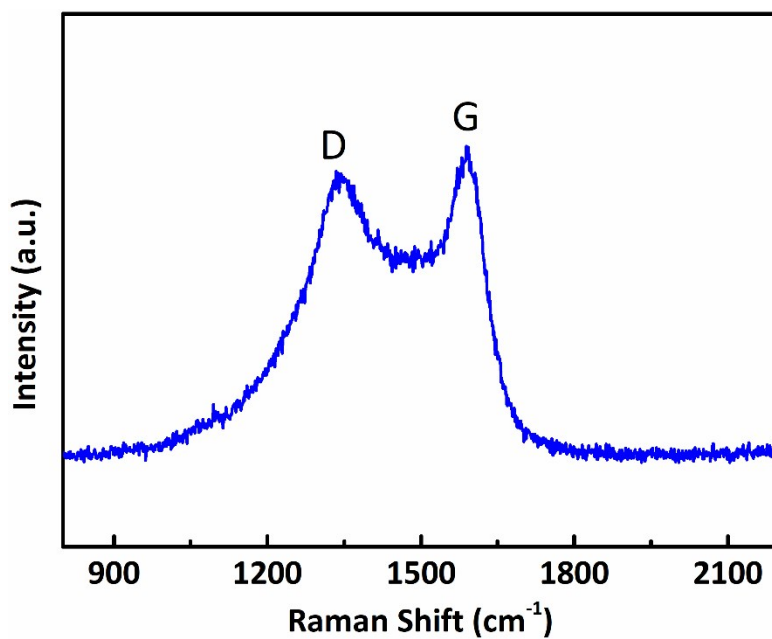

Fig. S3 Raman spectrum of Co@NPC

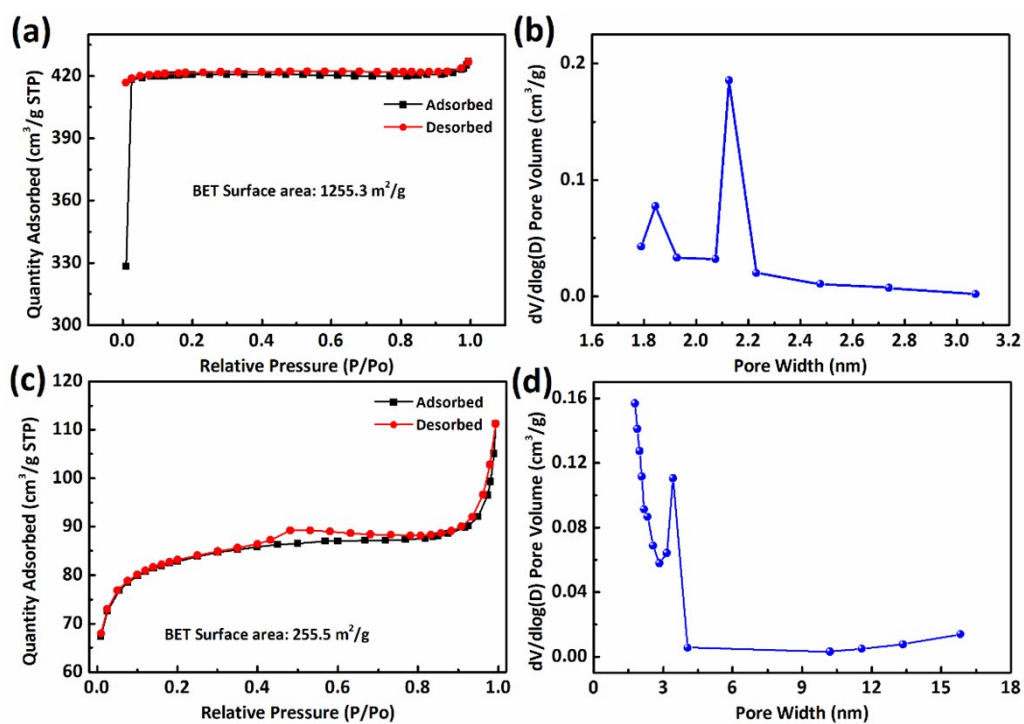

Fig. S4 N<sub>2</sub> adsorption-desorption isotherms of (a) ZIF-67 and (c) Co@NPC, pore size distribution of (b) ZIF-67 and (d) Co@NPC.

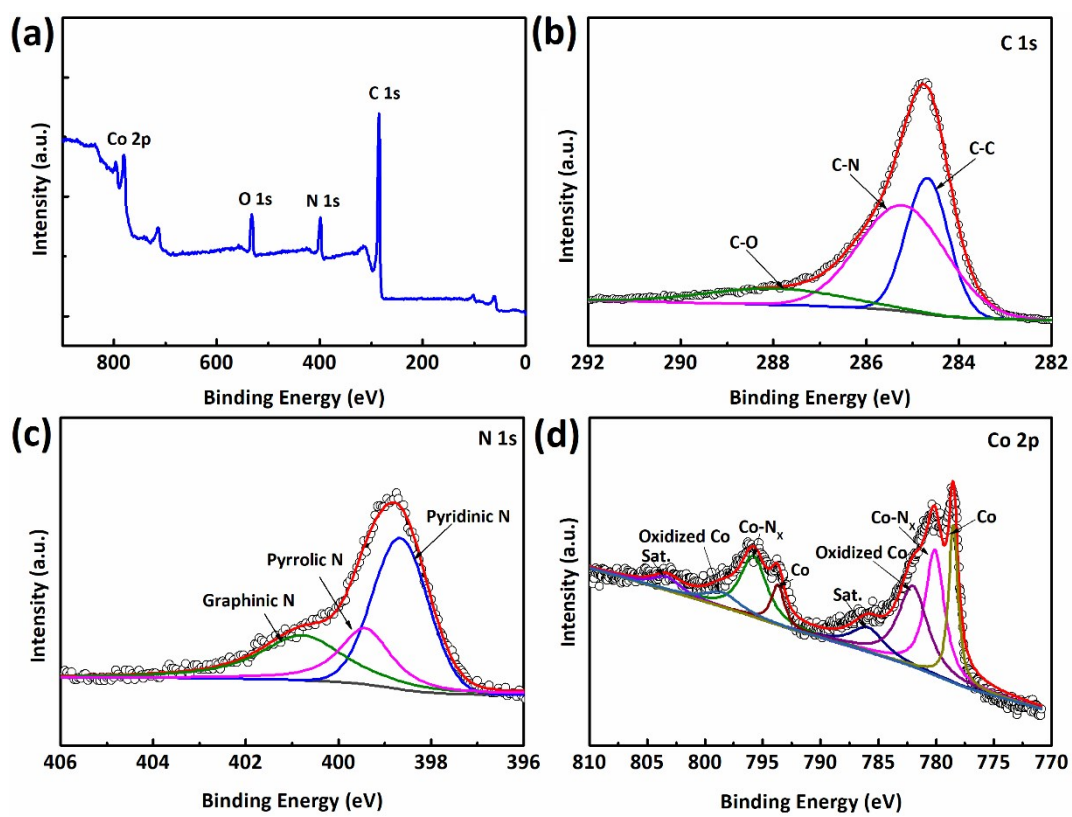

Fig. S5 (a) The XPS survey spectrum of Co@NPC. (b-d) high-resolution of XPS spectrums of C 1s, N 1s and Co 2p.

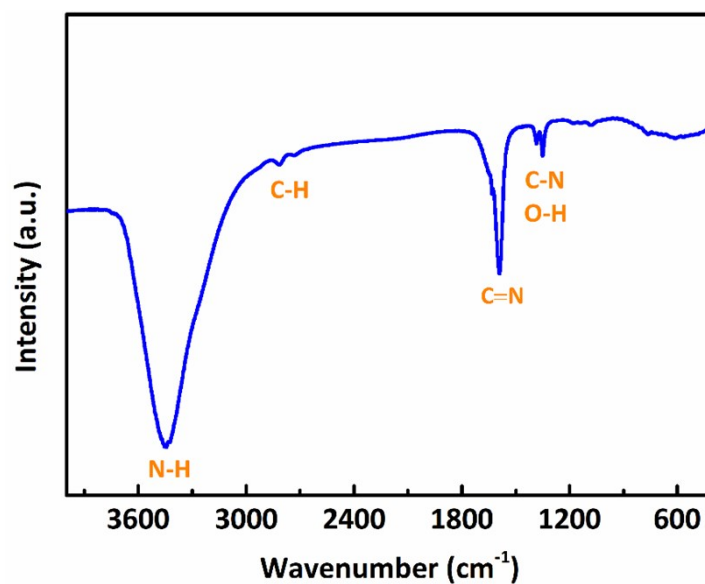

Fig. S6 FT-IR spectra of Co@NPC.

As shown in Fig. S6, the broad absorption band at 3450 cm<sup>-1</sup> is characteristic of the stretching vibration of N-H bonds. The band at 2820 cm<sup>-1</sup> is ascribed to the C-H stretching vibration. The band at 1590 cm<sup>-1</sup> is attributed to the C=N bond stretching vibration, which indicates the presence of N in the porous carbon. Besides, the two bands at 1340-1400 cm<sup>-1</sup> are related to C-N stretching and the O-H bonds bending vibration.

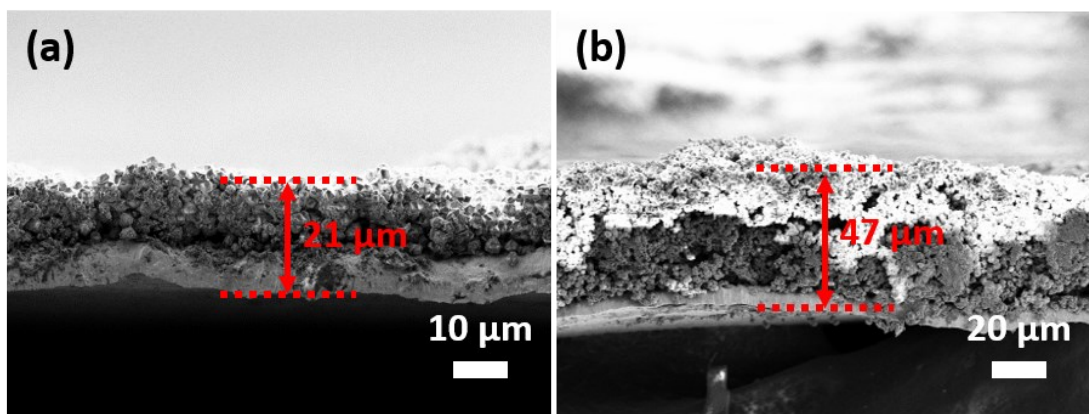

Fig. S7 Cross-section view of (a) ZIF-67/Cu and (b) ICDL/Cu electrodes before cycling.

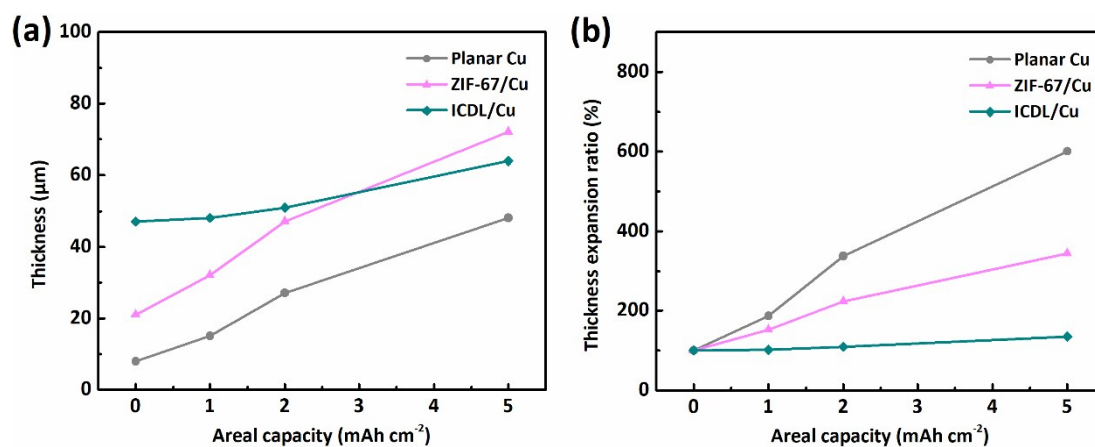

Fig. S8 (a) The thickness changes of planar Cu, ZIF-67/Cu, and ICDL/Cu after plating Li 0 mAh cm<sup>-2</sup>, 1 mAh cm<sup>-2</sup>, 2 mAh cm<sup>-2</sup>, and 5 mAh cm<sup>-2</sup>, (b) the thickness expansion ratio of planar Cu, ZIF-67/Cu, and ICDL/Cu after plating Li 0 mAh cm<sup>-2</sup>, 1 mAh cm<sup>-2</sup>, 2 mAh cm<sup>-2</sup>, and 5 mAh cm<sup>-2</sup>.

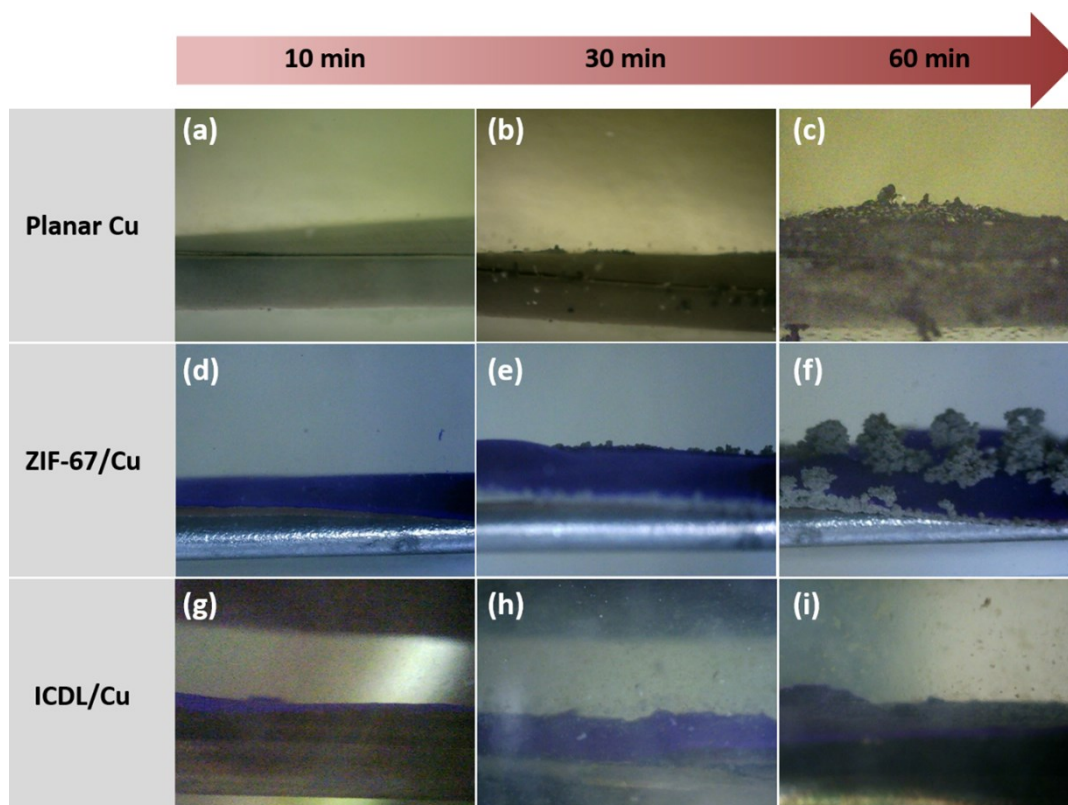

Fig. S9 Optical images of Li deposition on planar Cu, ZIF-67/Cu, and ICDL/Cu-Li for different time at the current density of  $3 \text{ mA cm}^{-2}$ .

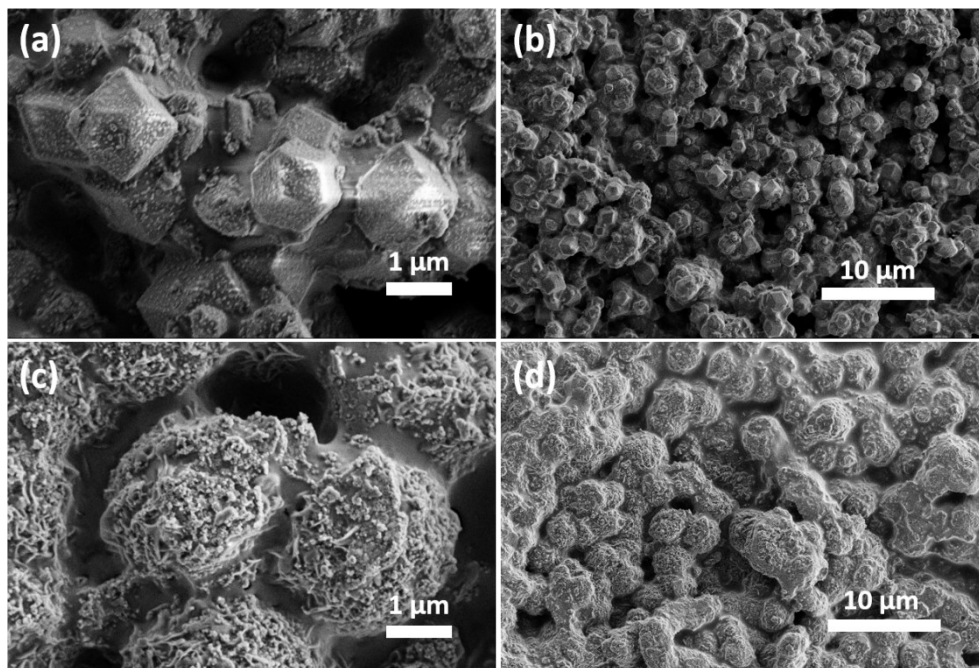

Fig. S10 SEM images of (a) ZIF-67 and (b) carbonized ZIF-67 after Li deposition with a capacity of  $1 \text{ mAh cm}^{-1}$ .

As shown in Fig. S10a, b, the polyhedral morphology of ZIF-67 is kept well, and the size of ZIF-67 nanoparticles does not change after plating Li, which proves the ZIF-67 coating layer is not involved in Li deposition. After Li deposition, the morphology of Co@NPC nanoparticles is changed significantly, and the Co@NPC is dispersive (Fig. S10c, d), suggesting that Li is firstly deposited on the Co@NPC in the initial Li plating stage due to the strong Li affinity of Co metal nanoparticles and N doped porous carbon.



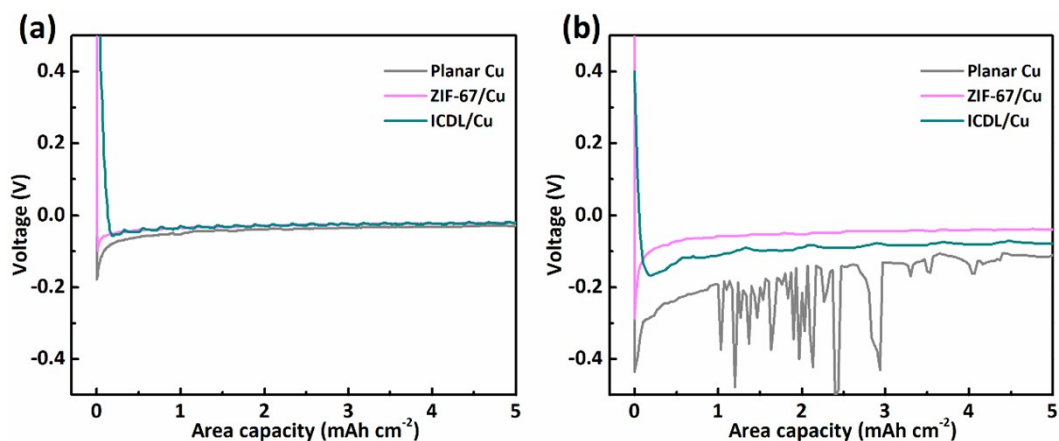

Fig. S11 Comparison of Li nucleation overpotential on the planar Cu, ZIF-67/Cu, and ICDL/Cu at the current density of (a)  $0.5 \text{ mA cm}^{-2}$  and (b)  $3 \text{ mA cm}^{-2}$ .

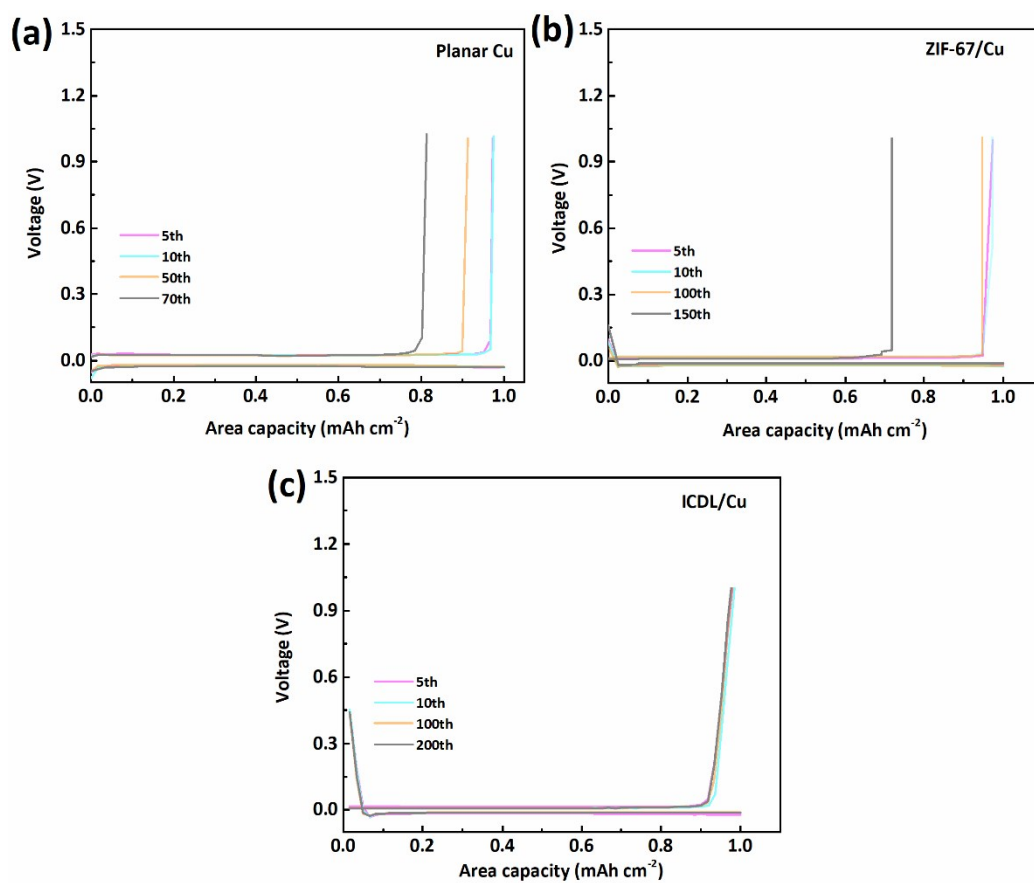

Fig. S12 Voltage profiles of Li plating/stripping of the (a) planar Cu, (b) ZIF-67/Cu, and (c) ICDL/Cu at the current density of  $1 \text{ mA cm}^{-2}$  for  $1 \text{ mAh cm}^{-2}$ .

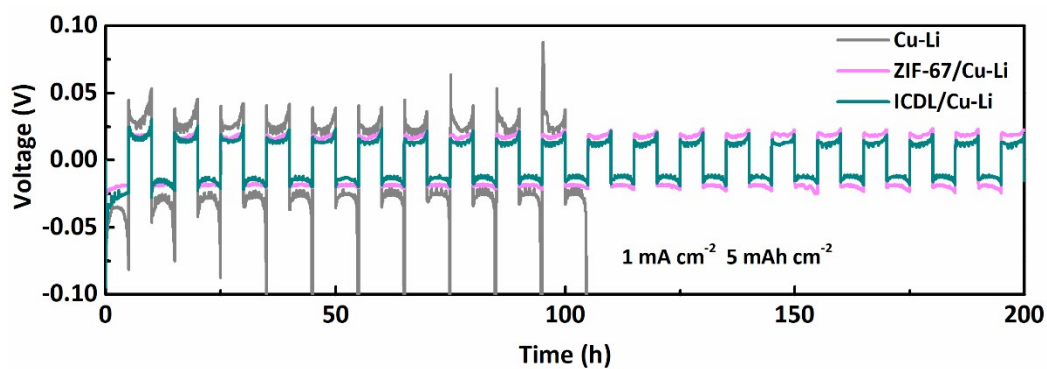

Fig. S13 Comparison of voltage profiles of symmetrical cells at the current density of  $1 \text{ mA cm}^{-1}$  with the plating/stripping capacity of  $5 \text{ mAh cm}^{-1}$ .

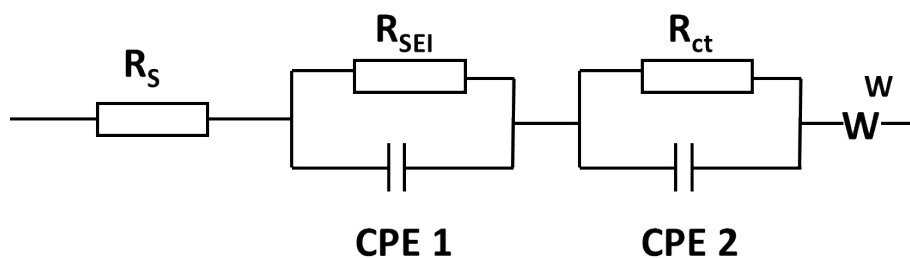

Fig. S14 The equivalent circuit of cells.

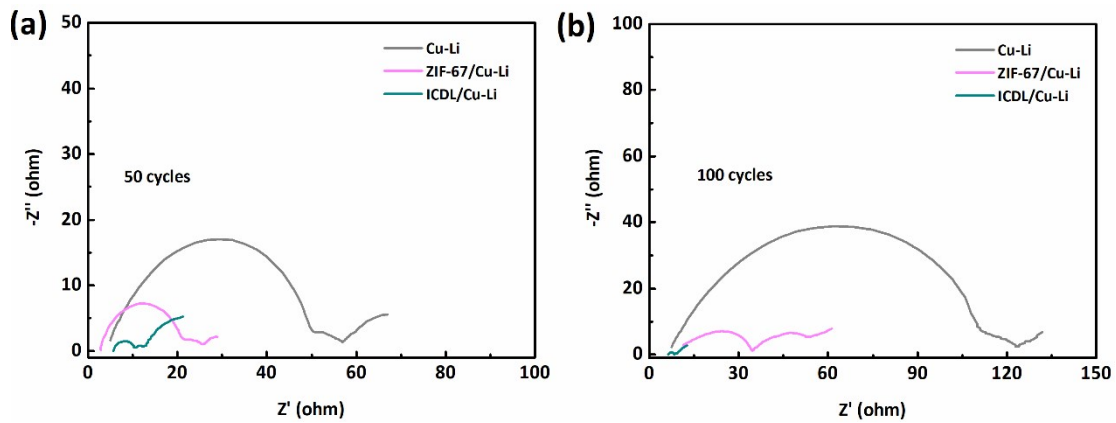

Fig. 15 Nyquist plots of impedance of symmetrical cells after (a) 50 cycles and (b) 100 cycles.

After 50 and 100 cycles, the ICDL/Cu-Li||ICDL/Cu-Li symmetrical cell exhibits the smallest values of  $R_{SEI}$  and  $R_{ct}$  than that of ZIF-67/Cu-Li||ZIF-67/Cu-Li and Cu-Li||Cu-Li. The impedances of ZIF-67/Cu-Li||ZIF-67/Cu-Li and Cu-Li||Cu-Li are gradually increased from 50 cycles to 100 cycles.

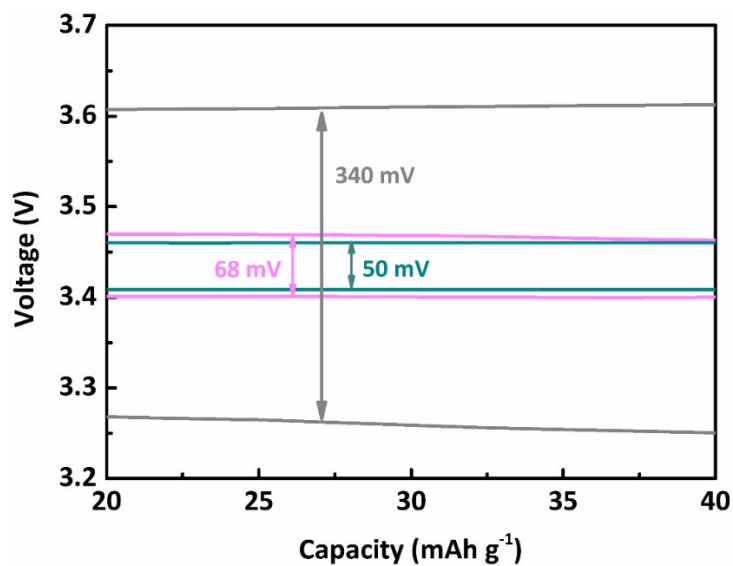

Fig. S16 Voltage polarization of full cells at 1 C.

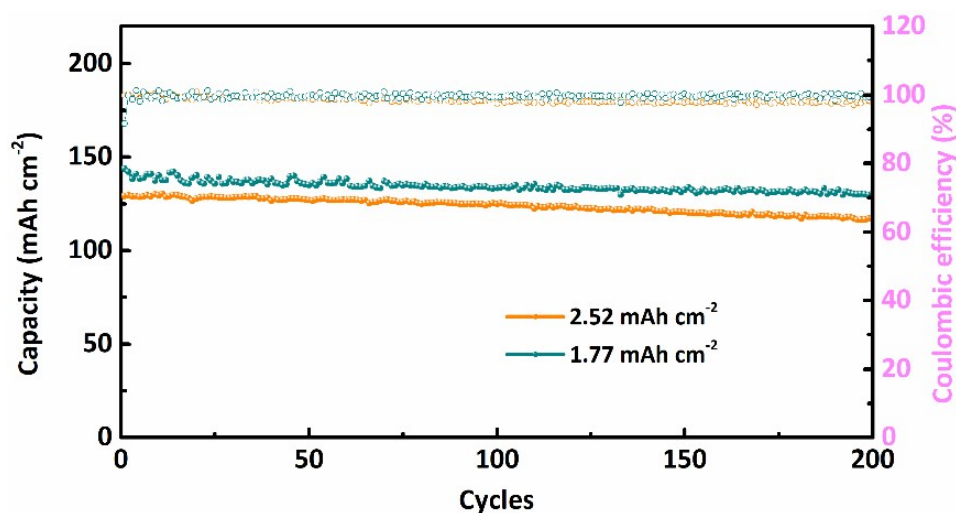

Fig. S17 Comparison of ICDL-Li||LFP cells with different LFP loading.

Table S1 Comparison of symmetrical cell cycling performance between this work and reported literature with the similar electrode configuration.

| Composite Li metal anode              | Current density- capacity (mA cm <sup>-2</sup> - mAh cm <sup>-2</sup> ) | Hysteresis voltage (mV) | Cycling time (h) | Reference |
|---------------------------------------|-------------------------------------------------------------------------|-------------------------|------------------|-----------|
| Li <sub>2</sub> CO <sub>3</sub> /PVDF | 1-1                                                                     | 50                      | 400              | 1         |

|                        |         |       |      |      |      |
|------------------------|---------|-------|------|------|------|
| coated Li              |         |       |      |      |      |
| ZnO-based              | 0.5-0.5 | ~ 100 | 500  | 2    |      |
| inorganic/organic      |         |       |      |      |      |
| double-layer structure |         |       |      |      |      |
| LiF/PEO coated Li      | 1-1     | 18    | 1000 | 3    |      |
| LiF-rich Li-Sb-Li      | 1-1     | 21    | 500  | 4    |      |
| MOF-HCF@Li             | 1-1     | ~ 20  | 1000 | 5    |      |
| 3D Zn/ZnO-Li           | 0.5-1   | ~ 23  | 900  | 6    |      |
| ICDL/Cu-Li             | 1-1     | 11    | 1100 | This | work |

Table S2 The simulated parameters of impedance.

| Samples        | Cu-Li |           |          | ZIF-67/Cu-Li |           |          | ICDL/Cu-Li |           |          |
|----------------|-------|-----------|----------|--------------|-----------|----------|------------|-----------|----------|
|                | $R_s$ | $R_{SEI}$ | $R_{ct}$ | $R_s$        | $R_{SEI}$ | $R_{ct}$ | $R_s$      | $R_{SEI}$ | $R_{ct}$ |
| Before cycling | 6.2   | 66.4      | 15.9     | 8.3          | 24.7      | 23.5     | 9.6        | 10.6      | 14.3     |
| 10 cycles      | 5.3   | 36.8      | 10.8     | 9.4          | 12.2      | 11.5     | 6.9        | 7.2       | 6.3      |
| 50 cycles      | 5.2   | 45.5      | 7.4      | 3.7          | 21.3      | 4.5      | 5.8        | 3.5       | 2.5      |

|            |     |       |      |      |      |      |     |     |     |
|------------|-----|-------|------|------|------|------|-----|-----|-----|
| 100 cycles | 7.7 | 103.6 | 17.2 | 11.1 | 23.5 | 20.8 | 7.2 | 6.8 | 5.6 |
|------------|-----|-------|------|------|------|------|-----|-----|-----|

---

## References

- 1 Y. Liu, S. Liu, S. Tan, Z. Jiang, X. Hu, H. Lu, G. Yin, Y. Gao and Y. Ma, *J. Alloy. Compd.*, 2020, 818, 152862.
- 2 Y. He, Y. Zhang, X. Li, Z. Lv, X. Wang, Z. Liu and X. Huang, *Energy Storage Materials*, 2018, 14, 392-401.
- 3 C. Fu and C. Battaglia, *ACS Appl. Mater. Inter.*, 2020, 12, 41620-41626.
- 4 Y. Zhang, G. Wang, L. Tang, J. Wu, B. Guo, M. Zhu, C. Wu, S.X. Dou and M. Wu, *J. Mater. Chem. A*, 2019, 7, 25369-25376.
- 5 Z. Zheng, Q. Su, Q. Zhang, X. Hu, Y. Yin, R. Wen, H. Ye, Z. Wang and Y. Guo, *Nano Energy*, 2019, 64, 103910.
- 6 Q. Chen, Y. Yang, H. Zheng, Q. Xie, X. Yan, Y. Ma, L. Wang and D. Peng, *J. Mater. Chem. A*, 2019, 7, 11683-11689.
